# Supplementary material
Source: publisher figshare collection journal article supplement (https://tandf.figshare.com/articles/dataset/_/19299897)
Supplement: Supplementary file 1 [file 1]

## Sheet: Supplemental Data 1
Journal of Vertebrate Paleontology Supplemental Data 1 for Allometric analysis sheds light on the systematics and ontogeny of anurognathid pterosaurs ZIXIAO YANG, MICHAEL J. BENTON, DAVID W. E. HONE, XING XU, MARIA E. MCNAMARA, and BAOYU JIANG
Taxon	Specimen	Skull length (mm)	Source	Skull width (mm)	Source	Scapula (mm)	Source	Coracoid (mm)	Source	Humerus (mm)	Source	Ulna or radius (mm)	Source	Pteroid (mm)	Source	Metacarpal IV (mm)	Source	Wing phalanx 1 (mm)	Source	Wing phalanx 2 (mm)	Source	Wing phalanx 3 (mm)	Source	Wing phalanx 4 (mm)	Source	Wing phalanges 3 and 4 (mm)	Source	Wingspan1 (mm)	Source	Femur (mm)	Source	Tibia (mm)	Source	Fibula (mm)	Source	Metatarsal I-IV (mm)	Source	PIII (mm)	Source	Foot(=metatarsal+pdIII) (mm)	Source	Manual claw (largest one) (mm)	Source	Pedal claw (largest one) (mm)	Source	pdV-1 (mm)	Source	pdV-2 (mm)	Source
Batrachognathus volans	PIN 52-2	48	Unwin & Bakhurina, 2000	42	measured from Fig. 4 of Dalla Vechia 2002					46.3	Bakhurina & Unwin 1995	49.5+	Ulna, Unwin et al. 2000															750	Bakhurina & Unwin 1995; Unwin & Bakhurina, 2000	30.8	Unwin et al. 2000	41	Unwin et al. 2000	23.6	measured from Fig. 4 of Dalla Vechia 2002	21.8	Unwin et al. 2000	15.6	measured from Fig. 4 of Dalla Vechia 2002	37.4	measured from Fig. 4 of Dalla Vechia 2002	7.5	measured from Fig. 4 of Dalla Vechia 2002	4.8	measured from Fig. 4 of Dalla Vechia 2002
	PIN 2585/4a	39	measured from fossil photo 1	27	measured from fossil photo 1					30	Costa et al. 2013
Anurognathus ammoni	SMNS 81928	15.3	measured from Fig. 3 of Bennett 2007	19.7	measured from Fig. 3 of Bennett 2007	14	mean, Bennett 2007			18.35	mean, Bennett 2007	25.95	Ulna mean, Bennett 2007	2.9	Bennett 2007	4.7	measured from Fig. 6 of Bennett 2007	28.95	mean, Bennett 2007	23.05	mean, Bennett 2007	12.7	Bennett 2007	0	Bennett 2007	12.7	Bennett 2007	239	=2.1*(humerus+ulna/radius+wing metacarpal +wingfinger)	14.5	Bennett 2007	19.7	=tibiotarsus - proximal tarsal (left, Bennett 2007)			8.7	Bennett 2007	6.9	measured from Fig. 7 of Bennett 2007	15.6	measured from Fig. 2 of Bennett 2007	2.8	measured from Fig. 6 of Bennett 2007	1.8	measured from Fig. 7 of Bennett 2007	6.1	mean, Bennett 2007	4.5	Bennett 2007
	BSP 1922 I 42 (holotype)	24	measured in Fig. 10 of Bennett 2007							32	Bennett 2007	46	Ulna, Bennett 2007	6	Bennett 2007	10.2	measured from Fig. 37 of Wellnhofer 1975	58	Bennett 2007									500	Wang et al. 2002	27	Bennett 2007	36.1	measured from Fig. 37 of Wellnhofer 1975			18	Bennett 2007	14	measured from Fig. 37 of Wellnhofer 1975	32	measured from Fig. 37 of Wellnhofer 1975	5.7	measured from Fig. 37 of Wellnhofer 1975	3.9	measured from Fig. 37 of Wellnhofer 1975	15.3	Bennett 2007	12.5	Bennett 2007
Dendrorhynchoides curvidentatus	GMV 2128	18.9	Caculated from Andres et al. 2014	25.4	measured from Fig.2 of Unwin et al. 2000	20	Ji & Ji 1998	17.3	Ji & Ji 1998	27.4	mean, Ji & Ji 1998	35.55	Ulna mean, Ji & Ji 1998	5.9	Ji & Ji 1998	9.3	Ji & Ji 1998	44.5	Ji & Ji 1998	36.3	mean, Ji & Ji 1998	27.9	Caculated from Andres et al. 2014					400	Ji & Ji 1998	19	Unwin et al. 2000	26.7	Ji & Ji 1998	10.9	measured from Fig.2 of Unwin et al. 2000	12.1	Unwin et al. 2000	11.5	measured from Fig.2 of Unwin et al. 2000	23.6	measured from Fig.2 of Unwin et al. 2000	4.3	measured from fossil photo 2	2.8	measured from fossil photo 2			8	Ji & Ji 1998
Luopterus mutoudengensis	JZMP-04-07-3	16	Lü & Hone 2012	20	Lü & Hone 2012	17	Lü & Hone 2012	9	Lü & Hone 2012	27	Lü & Hone 2012	42	Lü & Hone 2012			11	Lü & Hone 2012	50	Lü & Hone 2012	41	Lü & Hone 2012	25	Lü & Hone 2012	5	Lü & Hone 2012	30	Lü & Hone 2012	400	Lü & Hone 2012	21	Lü & Hone 2012	27	Lü & Hone 2012	15	Lü & Hone 2012	12	Lü & Hone 2012	9	Lü & Hone 2012	21	Lü & Hone 2012			2	Lü & Hone 2012	10	Lü & Hone 2012	9	Lü & Hone 2012
Jeholopterus	IVPP V12705 (holotype of Jeholopterus ningchengensis)	28	Wang et al. 2002	41	measured from Fig 1 of Wang et al. 2002	49	mean, Wang et al. 2002	24.5	mean, Wang et al. 2002	62	Wang et al. 2002	89	Ulna, Wang et al. 2002	13.5	Caculated from Andres et al. 2014	19	Wang et al. 2002	93	Wang et al. 2002	80.5	mean, Wang et al. 2002	60.5	mean, Wang et al. 2002	17	mean, Wang et al. 2002	77.5	Wang et al. 2002	900	Wang et al. 2002	40	Wang et al. 2002	50	Wang et al. 2002	24	measured from Fig.1 of Wang et al. 2002	22	Wang et al. 2002	26	Wang et al. 2002	48	Wang et al. 2002	13	=pedal claw*1.5, (Wang et al. 2002)	8.7	measured from photo 32	23	Wang et al. 2002	16	Wang et al. 2002
	CAGS-Z070 (refered to Jeholopterus)	21.1	measured from specimen	26.8	measured from specimen	19.9	measured from specimen	17.7	measured from specimen	32.25	measured from specimen	43.4	measured from specimen	5.8	measured from specimen	9.6	measured from specimen	48	measured from specimen	41.7	measured from specimen							450	Unwin 2005	23.5	measured from specimen	25.7	measured from specimen			11.7	measured from specimen	12.9	measured from specimen	24.6	measured from specimen	6.6	measured from specimen	4.3	measured from specimen	9	measured from specimen
Vesperopterylus lamadongensis	BMNHC-PH-001311	32.1	Lü et al. 2018	40.6	Lü et al. 2018	37.2	Lü et al. 2018	38.3	Lü et al. 2018	71	Lü et al. 2018	96.4	Ulna, Lü et al. 2018	13.7	Lü et al. 2018	25.8	Lü et al. 2018	117.8	Lü et al. 2018	95.4	Lü et al. 2018	71	Lü et al. 2018	14.3	Lü et al. 2018	85.3	Lü et al. 2018	1033	=2.1*(humerus+ulna/radius+wing metacarpal +wingfinger)	52.6	Lü et al. 2018	71.9	Lü et al. 2018	47.9	Lü et al. 2018	33	mean, Lü et al. 2018	30.7	Lü et al. 2018	63.7	Lü et al. 2018	13.6	Lü et al. 2018	9.8	mean, Lü et al. 2018	19.8	Lü et al. 2018
Cascocauda rong	NJU-57003	22.2	measured from specimen	31.7	measured from specimen	22	measured from specimen	18	measured from specimen	27.95	mean measurement from specimen	48	measured from specimen	4.7	measured from specimen	9.3	measured from specimen	49.7	measured from specimen	45.5	measured from specimen	21	measured from specimen	5.05	mean measurement from specimen	26.05	measured from specimen	434	=2.1*(humerus+ulna/radius+wing metacarpal +wingfinger)	21.5	measured from specimen	31	measured from specimen	15.9	measured from specimen	13.75	mean measurement from specimen	10	measured from specimen	23.75	mean measurement from specimen	4.5	measured from specimen	3	measured from specimen	10.5	measured from specimen	9	measured from specimen
Sinomacrops bondei	JPM-2012-001	19.7	measured from Fig. 3 of Wei et al. 2021			19.5	Wei et al. 2021	13.7	Wei et al. 2021	23.75	Wei et al. 2021	35.5	Wei et al. 2021			6.7	Wei et al. 2021	39.8	Wei et al. 2021	36	Wei et al. 2021	18.1	Wei et al. 2021							13.6	Wei et al. 2021	26.3	measured from Fig. 2 of Wei et al. 2021			10.5	Wei et al. 2021					3.2	measured from Fig. 2 of Wei et al. 2021	2.1	measured from Fig. 6 of Wei et al. 2021
Undetermined	IVPP V16728									28.2	Jiang et al. 2015	42	measured from Fig 1 of Jiang et al. 2015															355	estimated based on Fig 1 of Jiang et al. 2015	19.7	Jiang et al. 2015	25.7	measured from Fig 1 of Jiang et al. 2015			11	measured from Fig 1 of Jiang et al. 2015	9	measured from Fig 1 of Jiang et al. 2015	20	measured from Fig 1 of Jiang et al. 2015					8.9	measured from Fig 1 of Jiang et al. 2015	9.3	measured from Fig 1 of Jiang et al. 2015
	"Korean specimen"	29.2	measured from Fig. 3 of Gao et al. 2009	42	measured from Fig. 3 of Gao et al. 2009					50.2	measured from Fig. 3 of Gao et al. 2009																	800	Gao et al. 2009	33.2	measured from Fig. 3 of Gao et al. 2009
1 Calculation for wingspan follows Lü, J., Unwin, D. M., Deeming, D. C., Jin, X., Liu, Y., & Ji, Q. (2011). An egg-adult association, gender, and reproduction in pterosaurs. Science, 331(6015), 321-324.
2 There is no scale bar in photo 3, so pedal claw length was calculated from length ratio of the claw and pdV-2, the length of which is known from Wang et al., 2002
	Photo 1. The referred specimen of Batrachognathus volans (PIN 2585/4a).					Photo 2. Holotype of Dendrorhynchoides curvidentatus (GMV 2128).								Photo 3. A close-up on the feet of the holotype of Jeholopterus ningchengensis (IVPP V12705).
Literature Cited
Andres, B., J. M. Clark, and X. Xu. 2014. The earliest pterodactyloid and the origin of the group. Current Biology 24:1011–1016.
Bakhurina, N. N., and D. M. Unwin. 1995. A survey of pterosaurs from the Jurassic and Cretaceous of the former Soviet Union and Mongolia. Historical Biology 10:197–245.
Bennett, S. C. 2007. A second specimen of the pterosaur Anurognathus ammoni. Paläontologische Zeitschrift 81:376–398.
Costa, F., V. Alifanov, F. Dalla Vecchia, and A. W. A. Kellner. 2013. On the presence of an elongated tail in an undescribed specimen of Batrachognathus volans (Pterosauria: Anurognathidae: Batrachognathinae). In Rio Ptero 2013-International Symposium on Pterosaurs, Short Communications 54–56.
Dalla Vechia, F. M. 2002. Observations on the non-pterodactyloid pterosaur Jeholopterus ningchengensis from the Early Cretaceous of northeastern China. Natura Nascosta 24:8–27.
Gao, K., Q. Li, M. Wei, H. Pak, and I. Pak. 2009. Early Cretaceous birds and pterosaurs from the Sinuiju Series, and geographic extension of the Jehol Biota into the Korean Peninsula. Journal of the Paleontological Society of Korea 25:57–61.
Ji, S., and Q. Ji. 1998. A new fossil pterosaur (Rhamphorhynchoidea) from Liaoning. Jiangsu Geology 22:199–206. [Chinese]
Jiang, S., X. Wang, X. Cheng, F. R. Costa, J. Huang, and A. W. A. Kellner. 2015. Short note on an anurognathid pterosaur with a long tail from the Upper Jurassic of China. Historical Biology 27:718–722.
Lü, J., and D. W. E. Hone. 2012. A new Chinese anurognathid pterosaur and the evolution of pterosaurian tail lengths. Acta Geologica Sinica 86:1317–1325.
Lü, J., Q. Meng, B. Wang, D. Liu, C. Shen, and Y. Zhang. 2018. Short note on a new anurognathid pterosaur with evidence of perching behaviour from Jianchang of Liaoning Province, China. Geological Society, London, Special Publications 455:95–104.
Unwin, D. M. 2005. The pterosaurs from deep time. Pi Press, New York, 347 pp.
Unwin, D. M., and N. N. Bakhurina. 2000. Pterosaurs from Russia, Middle Asia and Mongolia; pp. 420–433 in M. J. Benton, M.A. Shishkin, D. M. Unwin, and E. N. Kurochkin (eds.), The age of dinosaurs in Russia and Mongolia. Cambridge University Press, Cambridge.
Unwin, D. M., J. Lü, and N. N. Bakhurina. 2000. On the systematic and stratigraphic significance of pterosaurs from the Lower Cretaceous Yixian Formation (Jehol Group) of Liaoning, China. Fossil Record 3:181–206.
Wang, X., Z. Zhou, F. Zhang, and X. Xu. 2002. A nearly completely articulated rhamphorhynchoid pterosaur with exceptionally well-preserved wing membranes and “hairs” from Inner Mongolia, northeast China. Chinese Science Bulletin 47:226–230.
Wei, X., R.V. Pêgas, C. Shen, Y. Guo, W. Ma, D. Sun and X. Zhou. 2021. Sinomacrops bondei, a new anurognathid pterosaur from the Jurassic of China and comments on the group. PeerJ 9:e11161.
Wellnhofer, P. 1975. Die Rhamphorhynchoidea (Pterosauria) der Oberjura-Plattenkalke Süddeutschlands. Palaeontographica A 148:1–33, 148:132–186, 149:1–30.

## Sheet: Supplemental Data 2
Journal of Vertebrate Paleontology Supplemental Data 2 for Allometric analysis sheds light on the systematics and ontogeny of anurognathid pterosaurs ZIXIAO YANG, MICHAEL J. BENTON, DAVID W. E. HONE, XING XU, MARIA E. MCNAMARA, and BAOYU JIANG
No.	Previous character	Usage (paraphrased, different color corresponding to each reference)	Reference	Note	Character list
1	Body size (wingspan)	Batrachognathus larger than Anurognathus; Jeholopterus large	Bakhurina & Unwin, 1995; Wang et al. 2002	Ontogeny-related	Not included
2	Skull size	Smaller in Luopterus mutoudengensis (0.74); even smaller in Vesperopterylus (skull width/humerus length 0.57)	Lü & Hone 2012; Lü et al. 2018	Ontogeny-related: Negative allometry in skull dimension	Not included
3	Skull aspect ratio	less wide in Luopterus mutoudengensis (length/width=0.8); shorter and wider in Jeholopterus; 0.791 in Vesperopterylus	Lü & Hone 2012; Wang et al. 2002; Lü et al. 2018	Ontogeny-related: Skull length grows negatively to width	Not included
4	(Femur + tibia)/humerus length	Batrachognathus (1.5-1.6) shorter than Anurognathus (>2)	Unwin & Bakhurina 2000	Ontogeny-related: Negative allometry in hindlimb relative to humerus	Not included
5	Metacapal 1-3 same in length	in Vesperopterylus, Batrachognathus, Dendrorhynchoides	Lü et al. 2018	Uninformative: subequel in all species	Not included
6	Metatarsal 4 shorter than 2-3	in Vesperopterylus and Jeholopterus	Lü et al. 2018	Uninformative: subequel in all species	Not included
7	WP1-4 and radius length	WP1>radius, WP2 close to radius, WP3WP4<<radius in Jeholopterus	Wang et al. 2002	Uninformative, appliable to all species	Not included
8	Wing claw length to pedal claw length	1.5 in Jeholopterus	Wang et al. 2002	Uninformative, similar in all species (1.4~1.6)	Not included
9	Number of wing fingers	3 in Anurognathus	Bennett 2007	Could be due to preservation bias (Hone et al., 2015, Hone 2020)	Not included
10	Jaw margin morphology	Evenly curving in Anurognathus, more angular in Dendrorhynchoides curvidentatus	Bennett 2007	Dendrorhynchoides curvidentatus skull is seriously crushed, and only the left side appears angular	Not included
11	Wing Metacarpal/Metatarsal length ratio	Vesperopterylus (0.76) Anurognathus holotype (0.61)	Lü et al. 2018	Ontogeny-related: wing metacarpal length shows positive allometry relative to metatarsal length	Not included
12	Wing Metacarpal/lower arm length ratio	<0.25 in Jeholopterus	Wang et al. 2002	In PCA results wing metacarpal shows isometric growth while ulna shows negative allometric growth.	Not included
13	humeral/femoral length ratio	over 1.40 among Batrachognathus volans, Jeholopterus ningchengensis and Dendrorhynchoides curvidentatus; over 1.60 in Batrachognathinae	Kellner 2003 and Wang et al., 2005; Wei et al. 2021	Ontogeny-related for most anurognathids: Negative allometry in femur relative to humerus. Only exception is Sinomacrops bondei, the femur of which is proportionally shorter compared to the other anurognathids.	Included as Char.43
14	Number of teeth	At least 11 maxillary teeth in Batrachognathus, 9 maxillary teeth in Anurognathus	Unwin & Bakhurina 2000; Bennett 2007	Diagnostic	Included as Char. 15
15	Coracoid slightly longer than scapula	in Vesperopterylus	Lü et al. 2018	Diagnostic	Included as Chars 28
16	Ulna/humerus length ratio	Vesperopterylus (1.36) Jeholopterus (1.44) Batrachognathus (1)	Lü et al. 2018	Isometric to each other, so the deviations from isometry could be diagnostic	Included as Char. 30
17	Wing Metacarpal/humerus length ratio	40.7% in Luopterus mutoudengensis, 33.5% in Dendrorhynchoides curvidentatus, 36% in Vesperopterylus	Lü & Hone 2012; Lü et al. 2018	Isometric to each other, so the deviations from isometry could be diagnostic	Included as Char. 33
18	WP2/WP1 length ratio	Vesperopterylus (0.79) Dendrorhynchoides (0.88) Jeholopterus (0.88)	Lü et al. 2018	Isometric to each other, so the deviations from isometry could be diagnostic	Included as Char. 37
19	Femur/tibia length ratio	Vesperopterylus (0.73) Jeholopterus (0.80); over 1.70 in Batrachognathus volans and Sinomacrops bondei	Lü et al. 2018; Wei et al. 2021	Isometric to each other, so the deviations from isometry could be diagnostic	Included as Char. 44
20	Anterior end of lower jaw horizontally expanded	in Vesperopterylus	Lü et al. 2018	Diagnostic	Included as Chars. 145
21	Caudal end of mandible without a distinct dorsal coronoid eminence	in Vesperopterylus	Lü et al. 2018	Diagnostic	Included as Chars. 154 and 155
22	Tooth length and curvature	Strongly recurved in Batrachognathus, straight in Anurognathus; long and recurved in Dendrorhynchoides curvidentatus, both short and straight, and long and recurved in Luopterus mutoudengensis; short and only slightly recurved in Anurognthus and Vesperopterylus, longer and more recurved in Jeholopterus, Dendrorhynchoides, Batrachognathus, Sinomacrops, Luopterus and NJU-57003.	Unwin & Bakhurina 2000; Lü & Hone 2012; Wei et al. 2021	Diagnostic	Included as Chars. 175 and 181
23	Postexapophyses present on cervical vertebrae	in Vesperopterylus	Lü et al. 2018	Diagnostic	Included as Chars. 199
24	Number of caudal vertebrae	15 or fewer in Vesperopterylus and Anurognathus	Lü et al. 2018	Diagnostic	Included as Chars. 208
25	Caudal vertebrae morphology	Disk-like centra in Anurognathus; elongated caudal chevrons only in IVPP V16728; caudal vertebrae bearing long zygapohyses and haemapophyses in Batrachognathus, IVPP V16728 and NJU-57003, and likely in Luopterus.	Bennett 2007; Hone 2020; Wei et al. 2021	Diagnostic	Included as Chars. 26, 31 and 209
26	Deltopectoral crest of humerus shape	Sub-triangular and smaller in Dendrorhynchoides and Luopterus, rounded in Anurognathus, sub-rectangular in Batrachognathus, alate in Jeholopterus; trapezoidal in Anurognathus, Vesperopterylus, the Korean specimen and Jeholopterus, subtriangular in Dendrorhynchoides, luopterus and NJU-57003, subrectangular in Batrachognathus and Sinomacrops	Lü & Hone 2012; Wei et al. 2021	Diagnostic	Included as Char. 234
27	Grooves on posterior surface of WP1-3	in Vesperopterylus	Lü et al. 2018	Diagnostic	Included as Char. 252
28	A prominent anteriorly directed tubercle on the dorsal apex of the external trochanter of the femur	in Vesperopterylus	Lü et al. 2018	Diagnostic	Included as Char. 268
29	2nd phalanx of pedal digit V shape	straight in Jeholopterus, curved in Anurognathus and Dendrorhynchoides; curved in Dendrorhynchoides, straight or slightly arched in Luopterus, Jeholopterus and Anurognathus	Wang et al. 2002; Wei et al. 2021	Diagnostic	Included as Char. 273
30	Posterior region of skull	rounded in Vesperopterylus, Anurognathus, Batrachognathus, straight in Luopterus mutoudengensis	Lü et al. 2018; Lü & Hone 2012	Diagnostic (however in Lü et al. 2018 Char 32 onlyVesperopterylus was coded as rounded, and the rest as not; the same is coded in the present study)	Included as Char. 274
31	1st toe reversed	in Vesperopterylus	Lü et al. 2018	Diagnostic	Included as Char. 275
32	mid-cervical vertebra ribs	completely lost in Anurognathus and Vesperopterylus, reduced in Batrachognathus, Dendrorhynchoides, Jeholopterus and Luopterus	Wei et al. 2021	Diagnostic	included as Char. 201
33	1st phalanx of pedal digit V/metatarsal length ratio	PV1 robust and longer (as long as Metatarsal1-4) in Jeholopterus, shorter in Anurognathus (holotype), even shorter in Dendrorhynchoides	Wang et al. 2002	Isometric to each other, so the deviations from isometry could be diagnostic	Added as Char. 47
34	Pedal digit V/pedal digit III length ratio	1.5 in Jeholopterus	Wang et al. 2002	Isometric to each other, so the deviations from isometry could be diagnostic	Added as Char. 48
35	Tail length	Shorter in Versperopterylus than in Dendrorhynchoides; longer than femur length in Batrachognathus, Sinomacrops, IVPP V16728 and NJU-57003, shorter than femur length in Luopterus, Jeholopterus, Anurognathus and Vesperopterylus.	Lü et al. 2018; Wei et al. 2021	Diagnostic	Added as Char. 49
36	Humerus, WP3 and tibia are similar in length	in Vesperopterylus	Lü et al. 2018	WP3 is allometric to humerus in length, which grows proportionally longer in ontogeny; tibia is isometric to humerus in length, so the deviations from isometry could be diagnostic	Added as Char. 50 (Tibia/humerus)
37	Tibia/ulna length ratio	64% in Luopterus mutoudengensis, 75% in Dendrorhynchoides curvidentatus	Lü & Hone 2012	Isometric to each other, so the deviations from isometry could be diagnostic	Added as Char. 51
38	Wing metacarpal curvature	curves posteriorly at the distal end (except Jeholopterus where it is straight)	Hone 2020	Diagnostic	Added as Char. 276
39	Manual unguals approximately as long as the penultimate phalanx on each respective digit measured along the dorsal edge of the ungula	except in Batrachognathus where they are shorter	Hone 2020	Diagnostic	Added as Char. 277
40	Metatarsal V	more robust in some taxa	Hone 2020	Diagnostic	Added as Char. 278
41	Dorsoventral height of pedal unguals more than twice that of the preceding phalanx	reduced in Batrachognathus	Hone 2020	Diagnostic	Added as Char. 279
42	Straight rib	in Anurognathus	Hone 2020	Diagnostic	Added as Char. 280
43	1st phalanx of pedal digit V robust	in Jeholopterus and Vesperopterylus	Hone 2020	Diagnostic	Added as Char. 281
44	Deltopectoral crest scarcely developed (less wide than humeral shaft)	in Batrachognathus volans and Sinomacrops bondei	Wei et al. 2021	Diagnostic	Added as Char. 282
45	ulnar crest size and shape	rounded in Batrachognathus volans and Sinomacrops bondei, subtriangular in Dendrorhynchoides, reduced in Jeholopterus, and elongated in Anurognthus and Vesperopterylus	Wei et al. 2021	Diagnostic	Included as Char. 236 and a newly added Char. 283
46	first three maxillary alveoli closely spaced	only in Sinomacrops	Wei et al. 2021	Diagnostic	Included as Chars. 170 and 177
47	roundness of the jaws in occlusal view	elliptical in Batrachognathus volans and Sinomacrops bondei, and semicircular in Anurognathus, Jeholopterus, Vesperopterylus and NJU-57003	Wei et al. 2021	Diagnostic	Added as Char. 284
48	size of deltopectoral crest	Subequal to humeral head in Dendrorhynchoides curvidentatus, Jeholopterus ningchengensis and Anurognathus ammnoni, smaller than humeral head in Batrachognathus and Sinomacrops	Wei et al. 2021	Diagnostic	Added as Char. 285
Literature Cited
Bakhurina, N. N., and D. M. Unwin. 1995. A survey of pterosaurs from the Jurassic and Cretaceous of the former Soviet Union and Mongolia. Historical Biology 10:197–245.
Bennett, S. C. 2007. A second specimen of the pterosaur Anurognathus ammoni. Paläontologische Zeitschrift 81:376–398.
Hone, D. W. E. 2020. A review of the taxonomy and palaeoecology of the Anurognathidae (Reptilia, Pterosauria). Acta Geologica Sinica 94:1676–1692.
Kellner, A. W. A. 2003. Pterosaur phylogeny and comments on the evolutionary history of the group. Geological Society, London, Special Publications 217:105–137.
Lü, J., and D. W. E. Hone. 2012. A new Chinese anurognathid pterosaur and the evolution of pterosaurian tail lengths. Acta Geologica Sinica 86:1317–1325.
Lü, J., Q. Meng, B. Wang, D. Liu, C. Shen, and Y. Zhang. 2018. Short note on a new anurognathid pterosaur with evidence of perching behaviour from Jianchang of Liaoning Province, China. Geological Society, London, Special Publications 455:95–104.
Unwin, D. M., and N. N. Bakhurina. 2000. Pterosaurs from Russia, Middle Asia and Mongolia; pp. 420–433 in M. J. Benton, M.A. Shishkin, D. M. Unwin, and E. N. Kurochkin (eds.), The age of dinosaurs in Russia and Mongolia. Cambridge University Press, Cambridge.
Wang, X., A. W. A. Kellner, Z. Zhou, and D. A. Campos. 2005. Pterosaur diversity and faunal turnover in Cretaceous terrestrial ecosystems in China. Nature 437:875–879.
Wang, X., Z. Zhou, F. Zhang, and X. Xu. 2002. A nearly completely articulated rhamphorhynchoid pterosaur with exceptionally well-preserved wing membranes and “hairs” from Inner Mongolia, northeast China. Chinese Science Bulletin 47:226–230.
Wei, X., R.V. Pêgas, C. Shen, Y. Guo, W. Ma, D. Sun and X. Zhou. 2021. Sinomacrops bondei, a new anurognathid pterosaur from the Jurassic of China and comments on the group. PeerJ 9:e11161.
