# Supplementary material
Source: publisher figshare collection journal article supplement (https://tandf.figshare.com/articles/dataset/_/19299897)
Supplement: Supplementary file 1 [file 1]

## **Ligand-based Discovery of New Potential acetylcholinesterase inhibitors for Alzheimer's disease treatment**

Y. Cañizares-Carmenate,<sup>a†</sup> N-H. Nam,<sup>b†</sup> R. Díaz-Amador,<sup>c</sup> N.T. Thuan,<sup>b</sup> P.T.P. Dung,<sup>b</sup> F.  
Torrens,<sup>d</sup> H. Pham-The,<sup>b</sup> F. Perez-Gimenez<sup>e</sup> and J.A. Castillo-Garit<sup>e,f,\*</sup>

### **Table of Contents**

|                                                       |          |
|-------------------------------------------------------|----------|
| <b>Section S1. Preparation of the dataset.....</b>    | <b>2</b> |
| <b>Section S2. Molecular descriptors.....</b>         | <b>3</b> |
| <b>Section S3. SVM models (kernel selection).....</b> | <b>4</b> |

## **Section S1. Preparation of the dataset**

In this study, we used a freely available dataset downloaded from the ChEMBL database [1]. The dataset was curated from ChEMBL database, following this steps:

- (1) Since May 20<sup>th</sup> 2020 we started collecting the data from ChEMBL database. In the Bioassay search, we used keyword “Acetylcholinesterase inhibitor”. The original output includes 28,304 cases with bioactivity expressed as Ki, IC<sub>50</sub>, %Inh... (very heterogeneous). We then only extracted compounds with IC<sub>50</sub> measurements.
- (2) We the discarded compounds with inconclusive data (>, <, ≥, ≤) and those with blank data. This step results in 12,806 cases.
- (3) Regarding the experimental conditions, we only selected compounds tested on single protein in vitro assay with organism mentioned as homo sapiens (human protein). Then only 3117 compounds satisfied our queries.
- (4) By comparing molecular weight and manual structure similarity inspection, we found 539 duplicated compounds.
- (5) Salts and metal complexes were detected and discarded. After this step, only 2142 compounds were kept.
- (6) Compounds detected by ChEMBL as “outside typical range” và “Potential transcription error” according to Data Validity module, we only obtained 1975 compounds which is the final number of data curated.

The dataset is finally composed by 1975 compounds of great structural diversity and with reported values of IC<sub>50</sub> enzyme inhibition against AChE.

## **Section S2. Molecular descriptors**

**Table S1.** Descriptors used in the Piecewise model

| <b>Descriptor</b> | <b>Definition</b>                                | <b>Descriptor Type</b>                     |
|-------------------|--------------------------------------------------|--------------------------------------------|
| <b>nArCONHR</b>   | number of secondary amides (aromatic)            | Functional group counts--Basic descriptors |
| <b>nS</b>         | number of Sulfur atoms                           | Constitutional indices--Basic descriptors  |
| <b>nR12</b>       | number of 12-membered rings                      | Ring descriptors--Basic descriptors        |
| <b>P_VSA_s_1</b>  | P_VSA-like on I-state, bin 1                     | P_VSA-like descriptors--Intrinsic State    |
| <b>nCs</b>        | number of total secondary C(sp <sup>3</sup> )    | Functional group counts--Basic descriptors |
| <b>nR10</b>       | number of 10-membered rings                      | Ring descriptors--Basic descriptors        |
| <b>nR=Ct</b>      | number of aliphatic tertiary C(sp <sup>2</sup> ) | Functional group counts--Basic descriptors |
| <b>nHM</b>        | number of heavy atoms                            | Constitutional indices--Basic descriptors  |
| <b>nHM</b>        | number of heavy atoms                            | Constitutional indices--Basic descriptors  |
| <b>nCrs</b>       | number of ring secondary C(sp <sup>3</sup> )     | Functional group counts--Basic descriptors |

**Table S2.** Descriptors used in the SVM model (RBF kernel)

| <b>Descriptor</b>  | <b>Definition</b>                                                       | <b>Descriptor Type</b>                                   |
|--------------------|-------------------------------------------------------------------------|----------------------------------------------------------|
| <b>nCs</b>         | number of total secondary C(sp <sup>3</sup> )                           | Functional group counts--Basic descriptors               |
| <b>GGI7</b>        | topological charge index of order 7                                     | 2D autocorrelations--Topological charge autocorrelations |
| <b>SpMax2_Bhs</b>  | largest eigenvalue n. 2 of Burden matrix weighted by I-state            | Burden eigenvalues--Largest eigenvalues                  |
| <b>SpMin1_Bhs</b>  | smallest eigenvalue n. 1 of Burden matrix weighted by I-state           | Burden eigenvalues--Smallest eigenvalues                 |
| <b>nR12</b>        | number of 12-membered rings                                             | Ring descriptors--Basic descriptors                      |
| <b>SIC3</b>        | Structural Information Content index (neighborhood symmetry of 3-order) | Information indices--Indices of neighborhood symmetry    |
| <b>totalcharge</b> | total charge                                                            | Constitutional indices--Basic descriptors                |
| <b>nP</b>          | number of Phosphorous atoms                                             | Constitutional indices--Basic descriptors                |
| <b>nArCOOR</b>     | number of esters (aromatic)                                             | Functional group counts--Basic descriptors               |
| <b>P_VSA_s_3</b>   | P_VSA-like on I-state, bin 3                                            | P_VSA-like descriptors--Intrinsic State                  |
| <b>DBI</b>         | Dragon branching index                                                  | Topological indices--Vertex degree-based indices         |
| <b>GATS3i</b>      | Geary autocorrelation of lag 3 weighted by ionization potential         | 2D autocorrelations--Geary autocorrelations              |

### **Section S3. SVM models (kernel selection)**

**Table S3.** Results using SVM linear kernel.

|           |    | Training                                    |          |    |
|-----------|----|---------------------------------------------|----------|----|
|           |    |                                             | Observed |    |
|           |    |                                             | 1        | -1 |
| Predicted | 1  | 826                                         | 0        |    |
|           | -1 | 661                                         | 0        |    |
|           |    | Se: 1<br>Sp: 0<br>Pr: 0.5554<br>Acc: 0.5555 |          |    |

|           |    | Test                                        |          |    |
|-----------|----|---------------------------------------------|----------|----|
|           |    |                                             | Observed |    |
|           |    |                                             | 1        | -1 |
| Predicted | 1  | 273                                         | 0        |    |
|           | -1 | 215                                         | 0        |    |
|           |    | Se: 1<br>Sp: 0<br>Pr: 0.5594<br>Acc: 0.5594 |          |    |

**Table S4.** Results using SVM quadratic kernel.

|           |    | Training                                    |          |           |    | Test                                        |          |   |    |
|-----------|----|---------------------------------------------|----------|-----------|----|---------------------------------------------|----------|---|----|
|           |    |                                             | Observed |           |    |                                             | Observed |   |    |
|           |    |                                             | 1        |           |    |                                             | -1       | 1 | -1 |
| Predicted | 1  | 826                                         | 0        | Predicted | 1  | 273                                         | 0        |   |    |
|           | -1 | 661                                         | 0        |           | -1 | 215                                         | 0        |   |    |
|           |    | Se: 1<br>Sp: 0<br>Pr: 0.5554<br>Acc: 0.5555 |          |           |    | Se: 1<br>Sp: 0<br>Pr: 0.5594<br>Acc: 0.5594 |          |   |    |

**Table S5.** Results using SVM cubic kernel.

|           |    | Training                                        |          |
|-----------|----|-------------------------------------------------|----------|
|           |    |                                                 | Observed |
|           |    |                                                 | 1        |
| Predicted | 1  | 826                                             | 0        |
|           | -1 | 659                                             | 2        |
|           |    | Se: 1<br>Sp: 0.003<br>Pr: 0.5562<br>Acc: 0.5598 |          |

|           |    | Test                                             |          |
|-----------|----|--------------------------------------------------|----------|
|           |    |                                                  | Observed |
|           |    |                                                  | 1        |
| Predicted | 1  | 272                                              | 1        |
|           | -1 | 215                                              | 0        |
|           |    | Se: 0.9903<br>Sp: 0<br>Pr: 0.5585<br>Acc: 0.5574 |          |

## References

- [1] D. Mendez, A. Gaulton, A.P. Bento, J. Chambers, M. De Veij, E. Félix, María P. Magariños, Juan F. Mosquera, P. Mutowo, M. Nowotka, M. Gordillo-Marañón, F. Hunter, L. Junco, G. Mugumbate, M. Rodriguez-Lopez, F. Atkinson, N. Bosc, Chris J. Radoux, A. Segura-Cabrera, A. Hersey, and Andrew R. Leach, *ChEMBL: towards direct deposition of bioassay data*, Nucleic Acids Research 47 (2019), pp. D930-D940.
